# Supplementary material for: Key genes associated with prognosis and metastasis of clear cell renal cell carcinoma
Source: PeerJ journal article supplement (doi:10.7717/peerj.12493), 2022-01-04

**A**

Expression of PCOLCE in KIRC based on Sample types

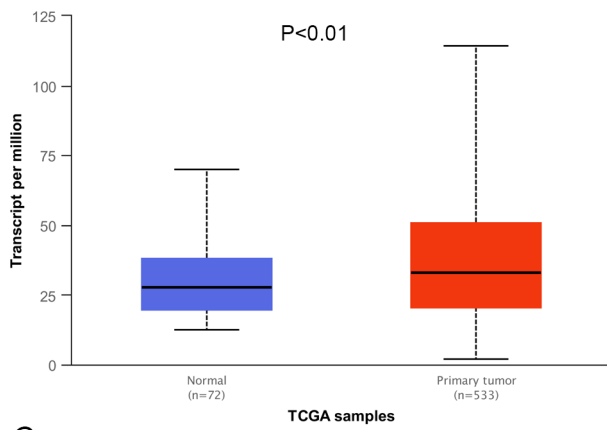**B**

Expression of P4HB in KIRC based on Sample types

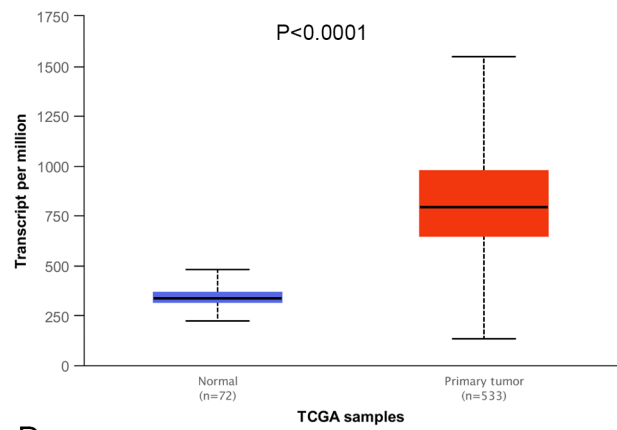**C**

Expression of COL6A2 in KIRC based on Sample types

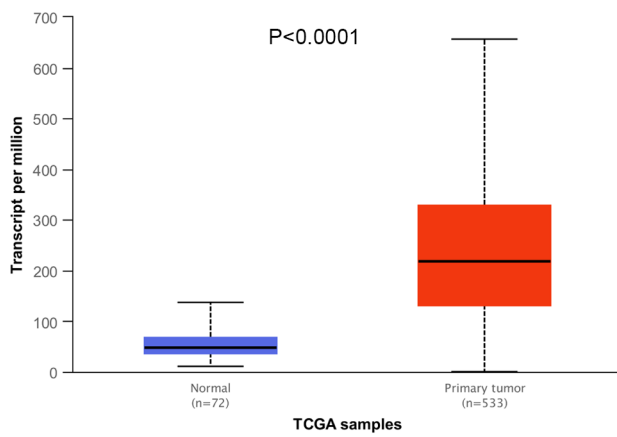**D**

Expression of COL6A3 in KIRC based on Sample types

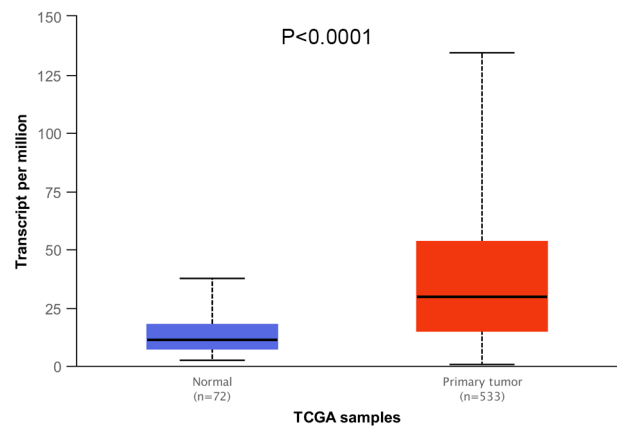

Supplement: Supplementary_Figure_1.pdf [file Supplementary_Figure_1.pdf]
